# Supplementary material for: Nutrient Composition and Flavor Profile of Crucian Carp Soup Utilizing Fish Residues through Comminution and Pressure-Conduction Treatment
Source: MDPI journal article supplement (doi:10.3390/foods13050800), 2024-03-05
Supplement: s1 [file s1]

Table S1. Scoring standard for basic attributes of crucian carp soup sensory evaluation

| Sample property |                                        | 0 points                               | 3.5 points                            | 7 points                                                          |
|-----------------|----------------------------------------|----------------------------------------|---------------------------------------|-------------------------------------------------------------------|
| Color           |                                        | Milky white                            | Light yellow or light gray            | Dark gray                                                         |
| Homogeneity     | More oil precipitation, the system has | obvious stratification, poor stability | Less grease precipitation, partially  | No obvious grease precipitation, the system is uniform and stable |
|                 |                                        |                                        | layered system, more stable           |                                                                   |
| Fishy odor      | Sniffing the sample, the sample has a  | distinct fishy odor                    | Sniffing the sample, the sample has a | Sniffing the sample, the sample has no fishy odor                 |
|                 |                                        |                                        | weak fishy odor                       |                                                                   |
| Umami           | Sniffing the sample, the sample has    | no fish flavor                         | Sniffing the sample, the sample has a | Sniffing the sample, the sample has a distinct fish flavor        |
|                 |                                        |                                        | weak fish flavor                      |                                                                   |
| Taste           | Tasting the sample, the sample has a   | distinct fishy flavor                  | Tasting the sample, the sample has a  | Tasting the sample, the sample's fresh aroma is obvious           |
|                 |                                        |                                        | weak fishy flavor                     |                                                                   |
| Texture         |                                        | Coarse and grainy mouthfeel            | More delicate mouthfeel, less grainy  | Delicate mouthfeel, weak graininess                               |

Table S2. Name and performance description of electronic nose sensor

| Number | Name | Performance description                       |
|--------|------|-----------------------------------------------|
| 1      | W1C  | Sensitive to aromatic compounds               |
| 2      | W5S  | Sensitive to nitrogen oxides                  |
| 3      | W3C  | Sensitive to amines and aromatic compounds    |
| 4      | W6S  | Selective for hydrides                        |
| 5      | W5C  | Sensitive to alkanes and aromatic compounds   |
| 6      | W1S  | Sensitive to methyl groups                    |
| 7      | W1W  | Sensitive to sulfide compounds                |
| 8      | W2S  | Sensitive to alcohols, aldehydes, and ketones |
| 9      | W2W  | Sensitive to aromatic components and sulfides |
| 10     | W3S  | Sensitive to alkanes and fatty compounds      |

Table S3. The mean intensity values of six attributes for crucian carp soup in descriptive sensory evaluation

| Samples | Mean score              |                        |                         |                         |                         |                        |
|---------|-------------------------|------------------------|-------------------------|-------------------------|-------------------------|------------------------|
|         | Color                   | Homogeneity            | Fishy odor              | Umami                   | Taste                   | Texture                |
| MS-10:0 | 5.07±1.58 <sup>a</sup>  | 4.67±2.19 <sup>a</sup> | 4.93±1.91 <sup>a</sup>  | 3.53±1.81 <sup>b</sup>  | 5.20±1.42 <sup>a</sup>  | 5.93±1.28 <sup>a</sup> |
| MS-7:3  | 3.20±1.27 <sup>b</sup>  | 3.87±1.41 <sup>b</sup> | 4.53±1.77 <sup>ab</sup> | 4.00±1.36 <sup>a</sup>  | 4.20±0.86 <sup>ab</sup> | 4.67±1.23 <sup>b</sup> |
| MS-5:5  | 2.87±1.36 <sup>bc</sup> | 3.53±1.36 <sup>b</sup> | 3.73±1.44 <sup>b</sup>  | 3.73±1.44 <sup>ab</sup> | 4.47±1.69 <sup>ab</sup> | 4.27±1.39 <sup>b</sup> |
| MS-3:7  | 2.33±1.88 <sup>bc</sup> | 3.93±1.75 <sup>b</sup> | 4.60±1.35 <sup>ab</sup> | 3.27±1.34 <sup>b</sup>  | 3.80±1.01 <sup>b</sup>  | 4.27±1.34 <sup>b</sup> |
| MS-0:10 | 1.87±1.25 <sup>c</sup>  | 3.67±2.09 <sup>b</sup> | 3.87±2.13 <sup>ab</sup> | 3.53±1.60 <sup>b</sup>  | 3.60±1.60 <sup>b</sup>  | 4.13±1.69 <sup>b</sup> |

*Note.* Each value is expressed as means ± S.D. (n=3). Means with different letters in the same column are significantly different ( $p<0.05$ ).

Table S4. Free amino acids composition and contents under different blend ratios of crucian carp soup (wet basis)

| Free amino acids          | Taste               | Contents /(mg/100mL)    |                          |                          |                          |                          |
|---------------------------|---------------------|-------------------------|--------------------------|--------------------------|--------------------------|--------------------------|
|                           | property            | MS-10:0                 | MS-7:3                   | MS-5:5                   | MS-3:7                   | MS-0:10                  |
| Essential amino acids     |                     |                         |                          |                          |                          |                          |
| Threonine                 | Sweet (+)           | 1.57±0.001 <sup>a</sup> | 1.20±0.001 <sup>b</sup>  | 1.07±0.001 <sup>bc</sup> | 0.97±0.001 <sup>c</sup>  | 0.47±0.001 <sup>d</sup>  |
| Valine                    | Bitter (-)          | 1.77±0.002 <sup>a</sup> | 1.43±0.001 <sup>b</sup>  | 1.33±0.001 <sup>b</sup>  | 1.03±0.002 <sup>c</sup>  | 0.63±0.001 <sup>d</sup>  |
| Methionine                | Sweet (+)           | 4.47±0.001 <sup>a</sup> | 4.83±0.004 <sup>a</sup>  | 2.40±0.000 <sup>b</sup>  | 2.37±0.002 <sup>b</sup>  | 2.43±0.001 <sup>b</sup>  |
| Isoleucine                | Bitter (-)          | 0.83±0.001 <sup>a</sup> | 0.67±0.001 <sup>a</sup>  | 0.67±0.001 <sup>a</sup>  | 0.43±0.001 <sup>b</sup>  | 0.30±0.001 <sup>b</sup>  |
| Leucine                   | Bitter (-)          | 1.77±0.004 <sup>a</sup> | 1.40±0.003 <sup>ab</sup> | 1.43±0.002 <sup>ab</sup> | 1.10±0.001 <sup>b</sup>  | 0.63±0.001 <sup>c</sup>  |
| Phenylalanine             | Bitter (-)          | 1.50±0.002 <sup>a</sup> | 1.13±0.004 <sup>ab</sup> | 0.97±0.003 <sup>b</sup>  | 0.83±0.003 <sup>bc</sup> | 0.43±0.001 <sup>c</sup>  |
| Lysine                    | Sweet (+)           | 4.63±0.003 <sup>a</sup> | 3.13±0.002 <sup>bc</sup> | 3.40±0.005 <sup>b</sup>  | 2.57±0.003 <sup>c</sup>  | 1.90±0.001 <sup>d</sup>  |
| Histidine                 | Bitter (-)          | 55.40±0.00 <sup>a</sup> | 45.60±0.007 <sup>b</sup> | 36.70±0.002 <sup>c</sup> | 30.33±0.002 <sup>d</sup> | 18.40±0.006 <sup>e</sup> |
| Non-essential amino acids |                     |                         |                          |                          |                          |                          |
| Serine                    | Sweet (+)           | 1.50±0.000 <sup>a</sup> | 1.23±0.001 <sup>b</sup>  | 1.03±0.001 <sup>c</sup>  | 0.90±0.000 <sup>c</sup>  | 0.53±0.001 <sup>d</sup>  |
| Glutamic acid             | Fresh (+)           | 2.03±0.002 <sup>a</sup> | 1.53±0.001 <sup>b</sup>  | 1.43±0.001 <sup>bc</sup> | 1.23±0.001 <sup>c</sup>  | 0.70±0.001 <sup>d</sup>  |
| Glycine                   | Sweet/ Fresh<br>(+) | 20.63±0.00 <sup>a</sup> | 16.27±0.003 <sup>b</sup> | 13.83±0.002 <sup>c</sup> | 11.37±0.001 <sup>d</sup> | 6.53±0.001 <sup>e</sup>  |
| Alanine                   | Sweet/ Fresh<br>(+) | 8.80±0.002 <sup>a</sup> | 6.83±0.003 <sup>b</sup>  | 6.03±0.001 <sup>c</sup>  | 4.93±0.001 <sup>d</sup>  | 2.67±0.001 <sup>e</sup>  |

|                   |            |                           |                          |                          |                          |                          |
|-------------------|------------|---------------------------|--------------------------|--------------------------|--------------------------|--------------------------|
| Tyrosine          | Bitter (-) | 1.67±0.004 <sup>a</sup>   | 1.23±0.004 <sup>ab</sup> | 1.10±0.002 <sup>bc</sup> | 0.93±0.001 <sup>bc</sup> | 0.60±0.001 <sup>c</sup>  |
| Total amino acids |            | 106.53±0.005 <sup>a</sup> | 86.43±0.007 <sup>b</sup> | 71.42±0.001 <sup>c</sup> | 59.02±0.008 <sup>d</sup> | 36.26±0.008 <sup>e</sup> |

---

*Note.* +: indicates a pleasant, fresh or sweet taste; -: indicates a bad taste, bitter or sulphuric taste. Different letters in the same row indicate significant differences between samples ( $p<0.05$ ).
